# Supplementary material for: Stromal and therapy-induced macrophage proliferation promotes PDAC progression and susceptibility to innate immunotherapy
Source: PubMed Central journal article supplement — J Exp Med. 2023 Mar 23;220(6):e20212062. doi: 10.1084/jem.20212062 (PMC10072222; doi:10.1084/jem.20212062), 2023-03-23
Supplement: JEM_20212062_SourceDataF4.pdf [file JEM_20212062_SourceDataF4.pdf]

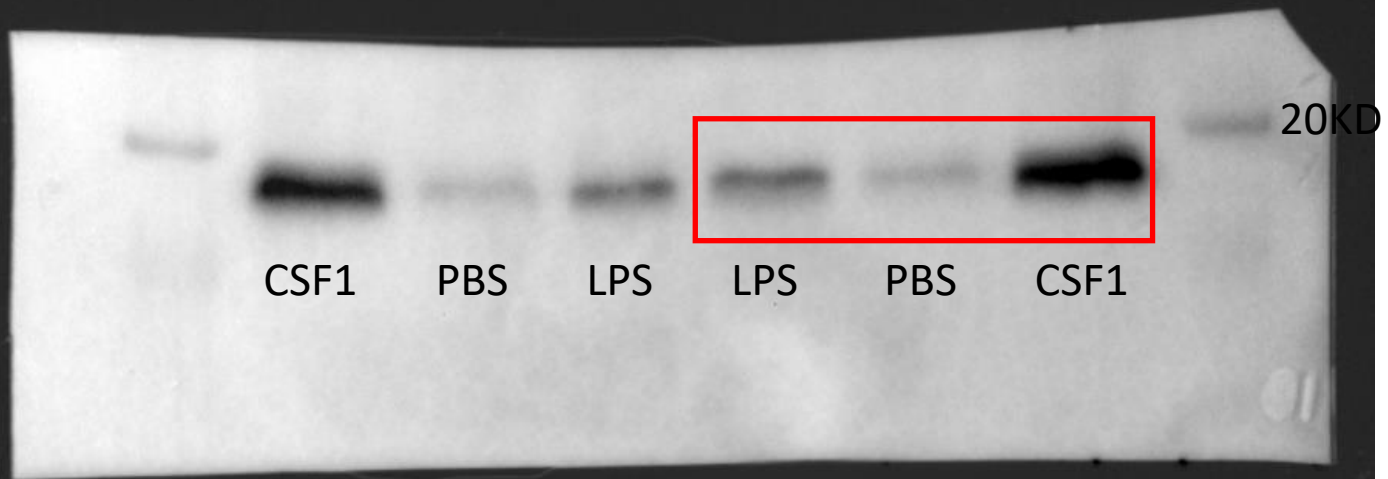

Fig 4A

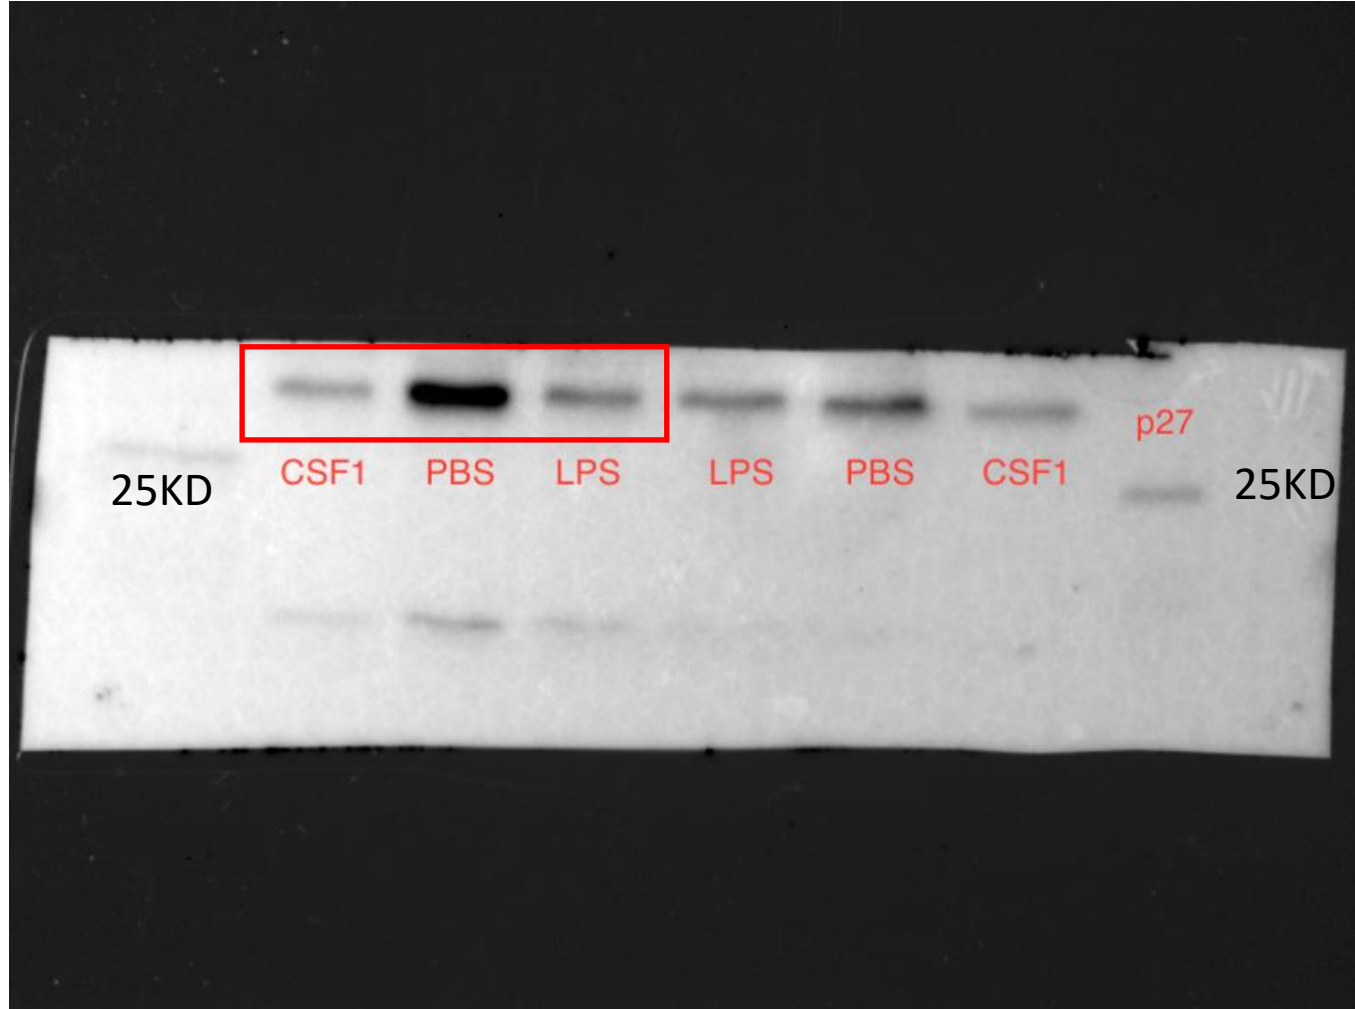

Fig 4A

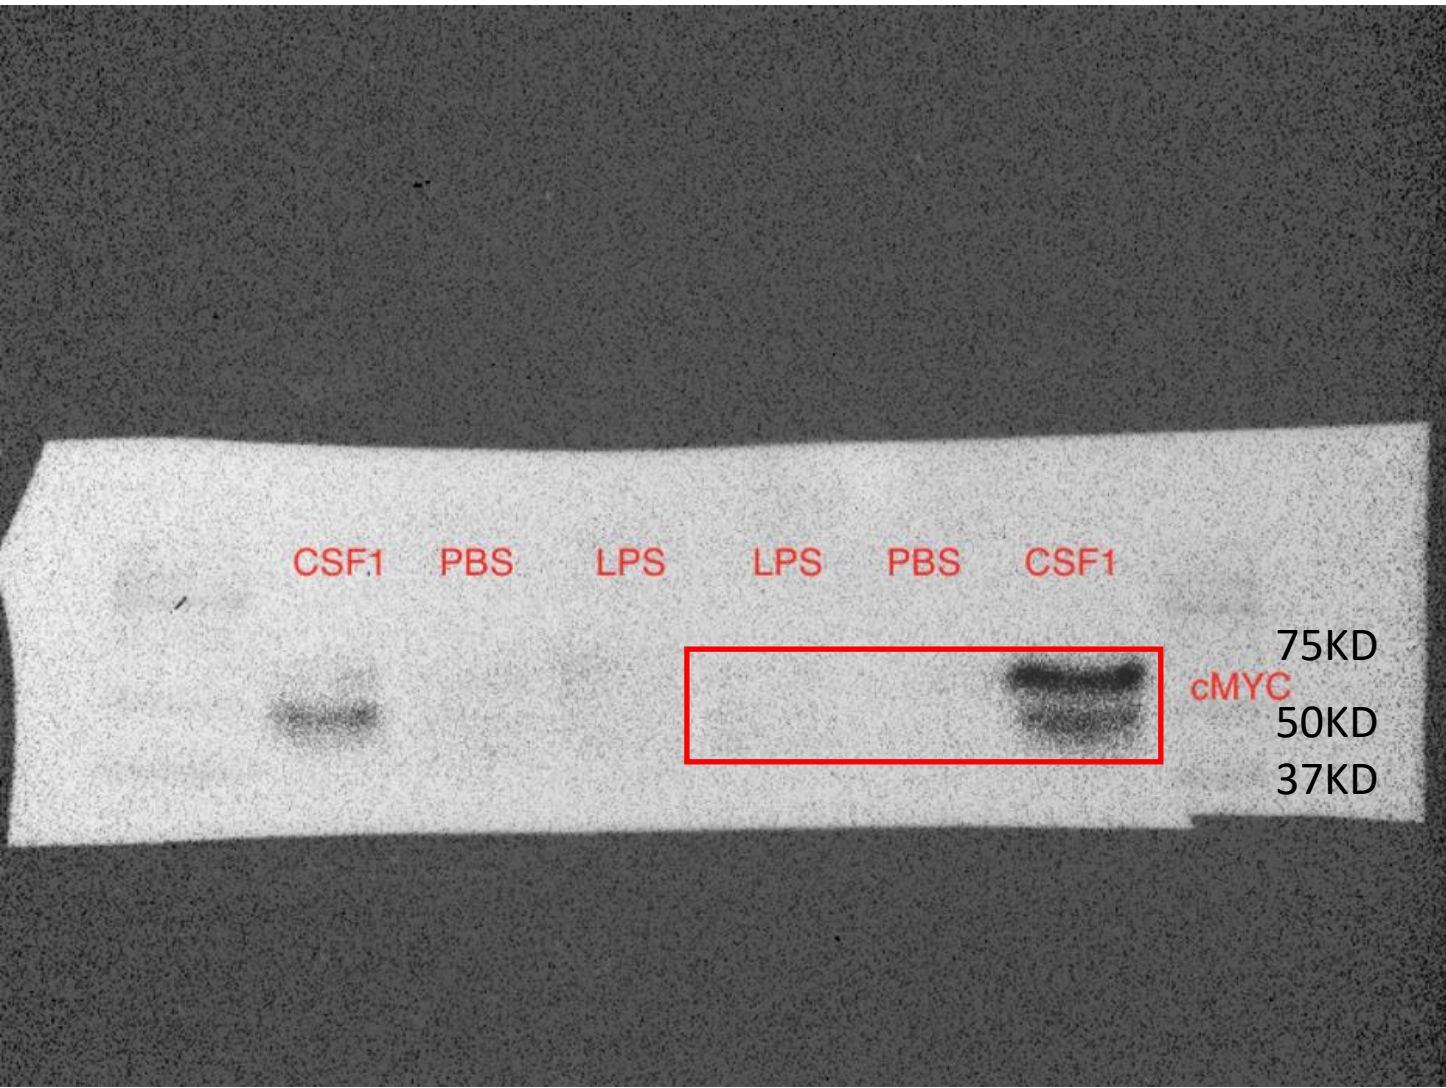

Fig 4A

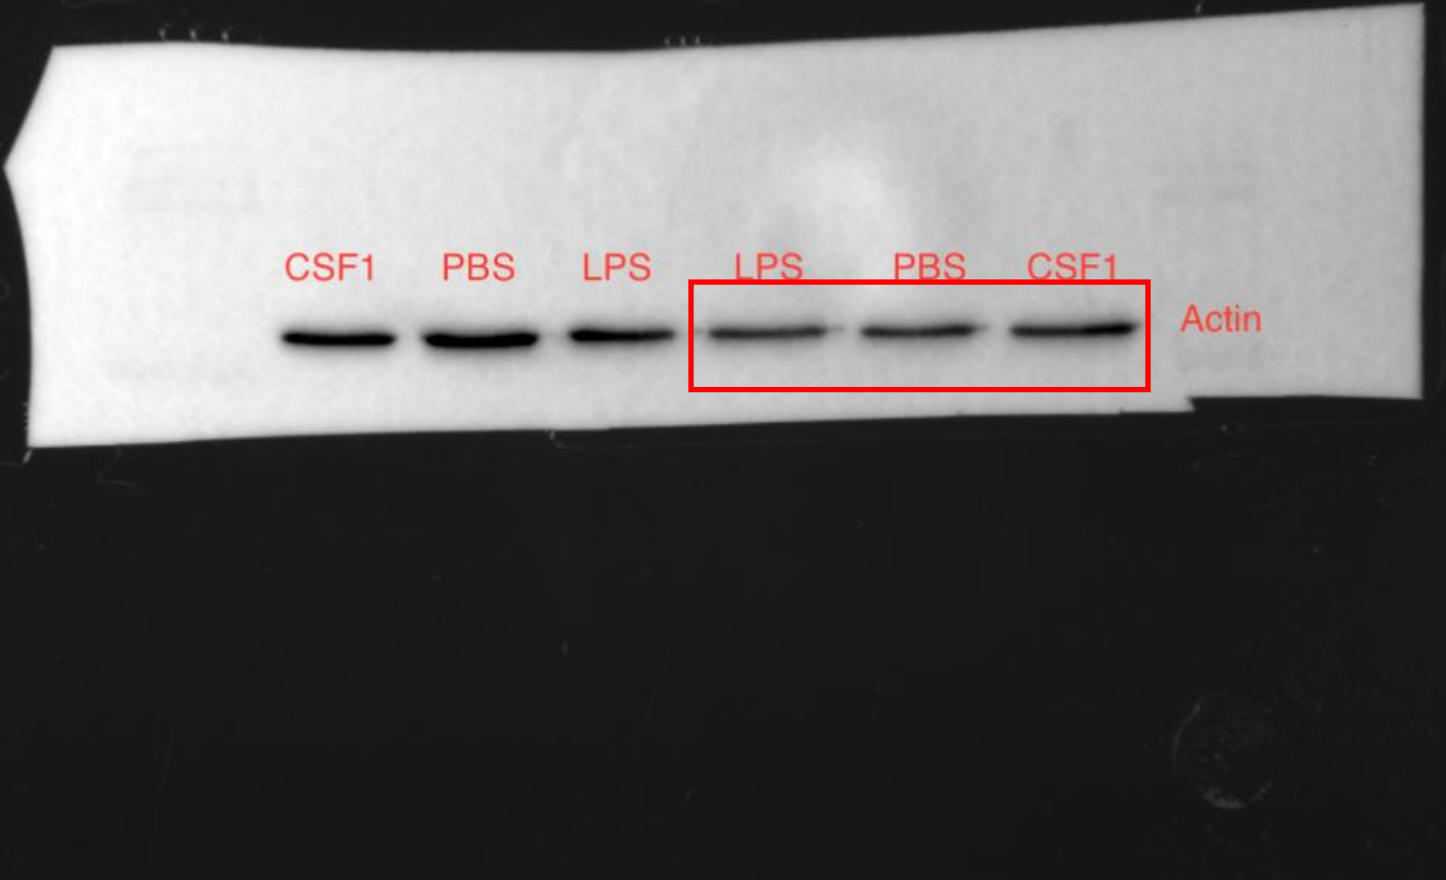

Fig 4A

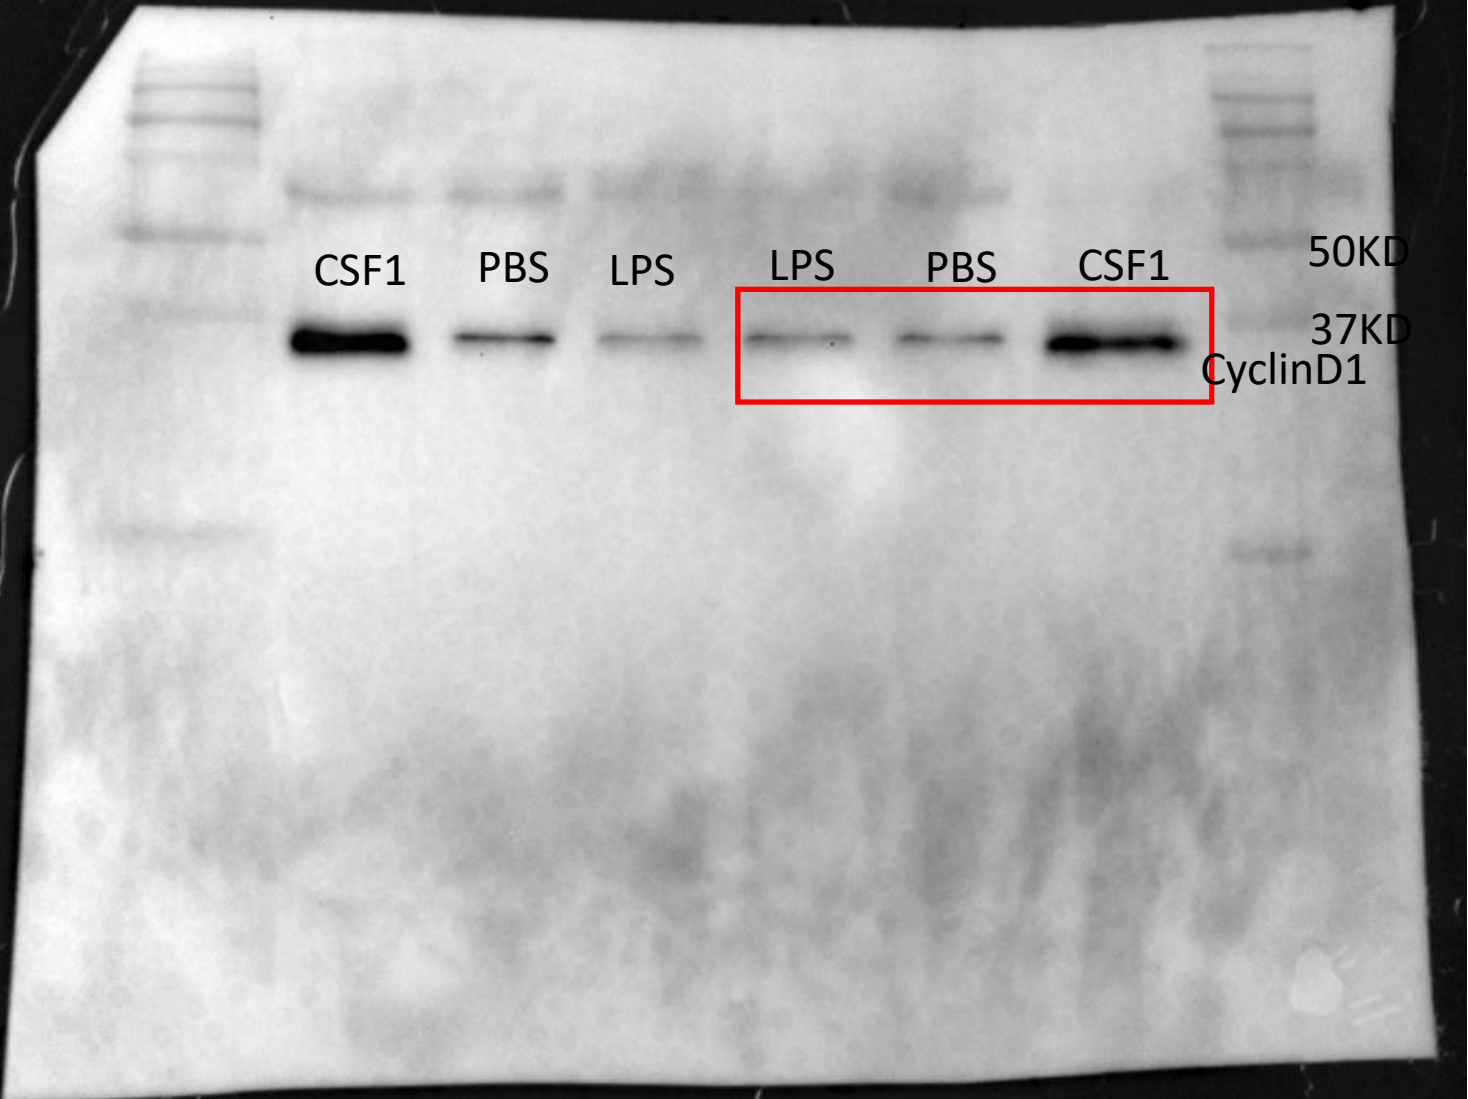

Fig 4A

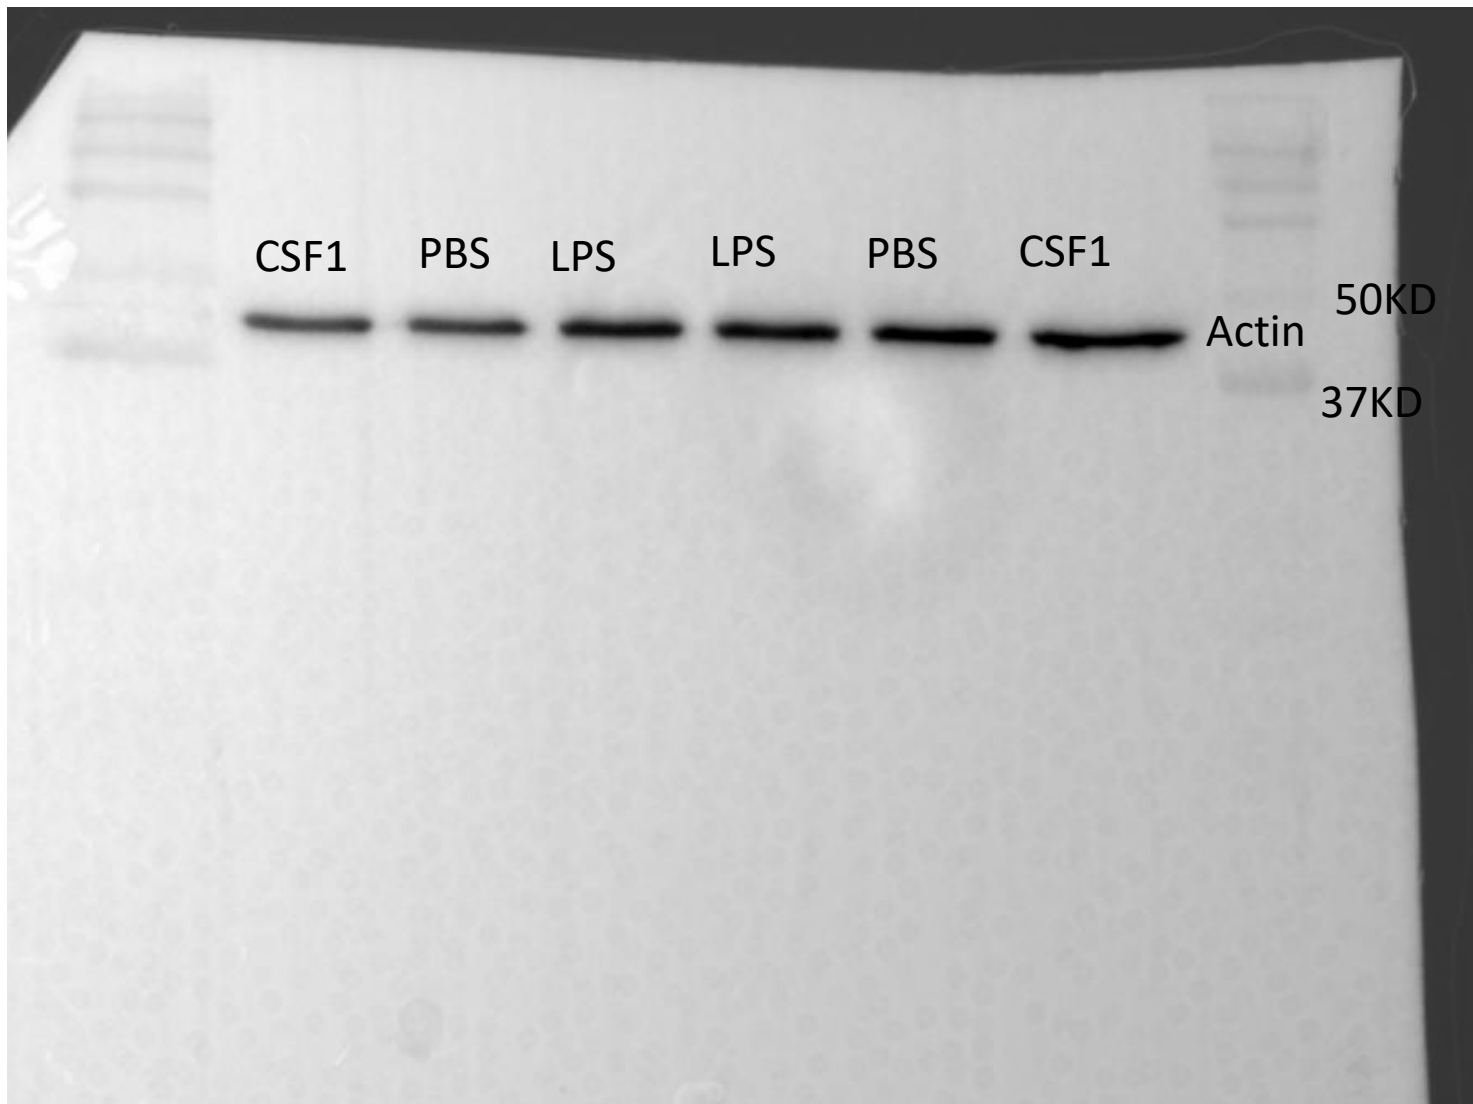

Fig 4A  
Actin for cyclinD1 omitted

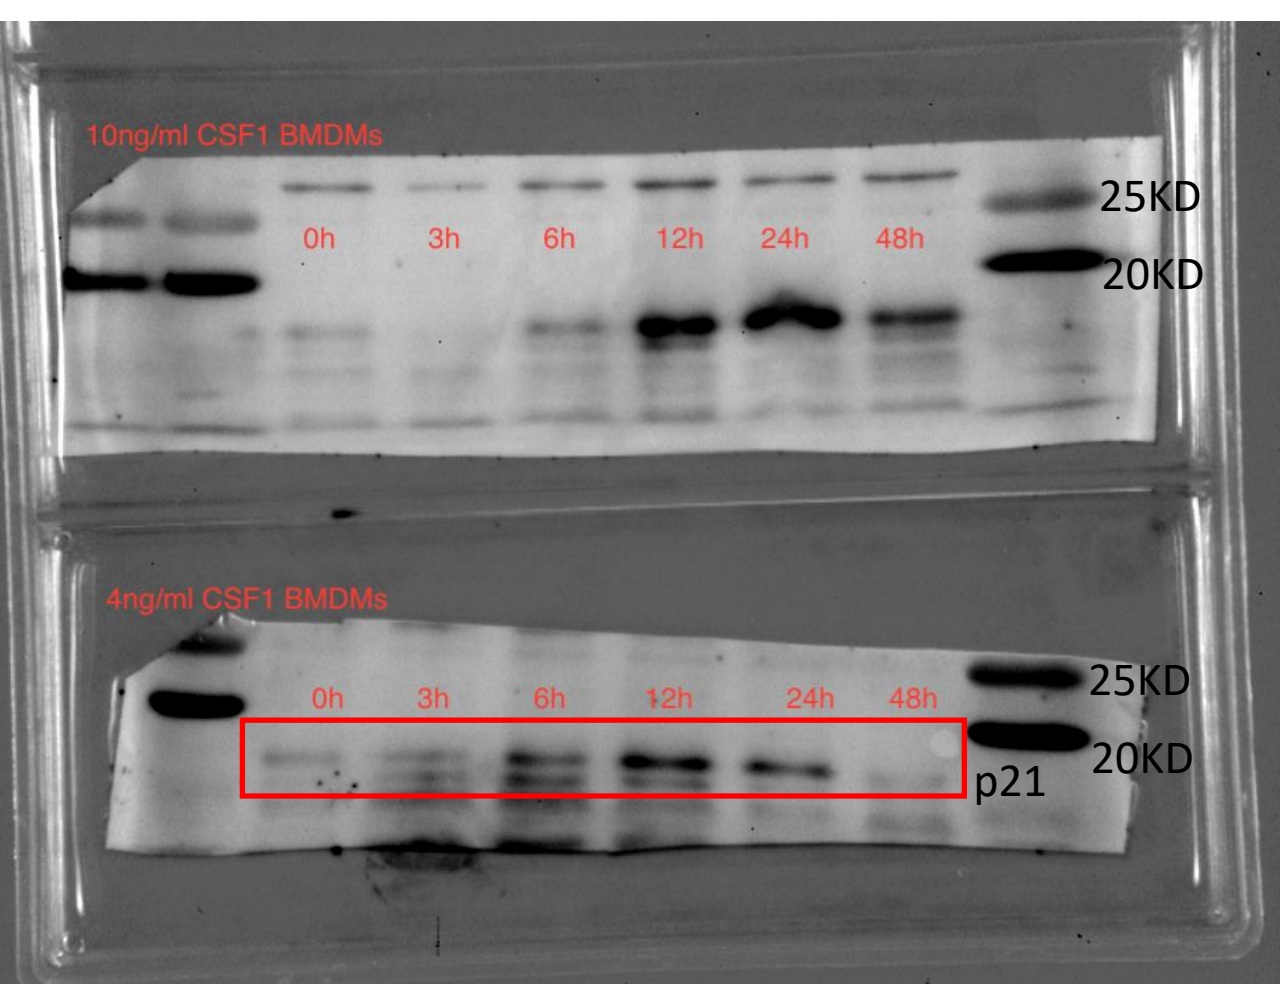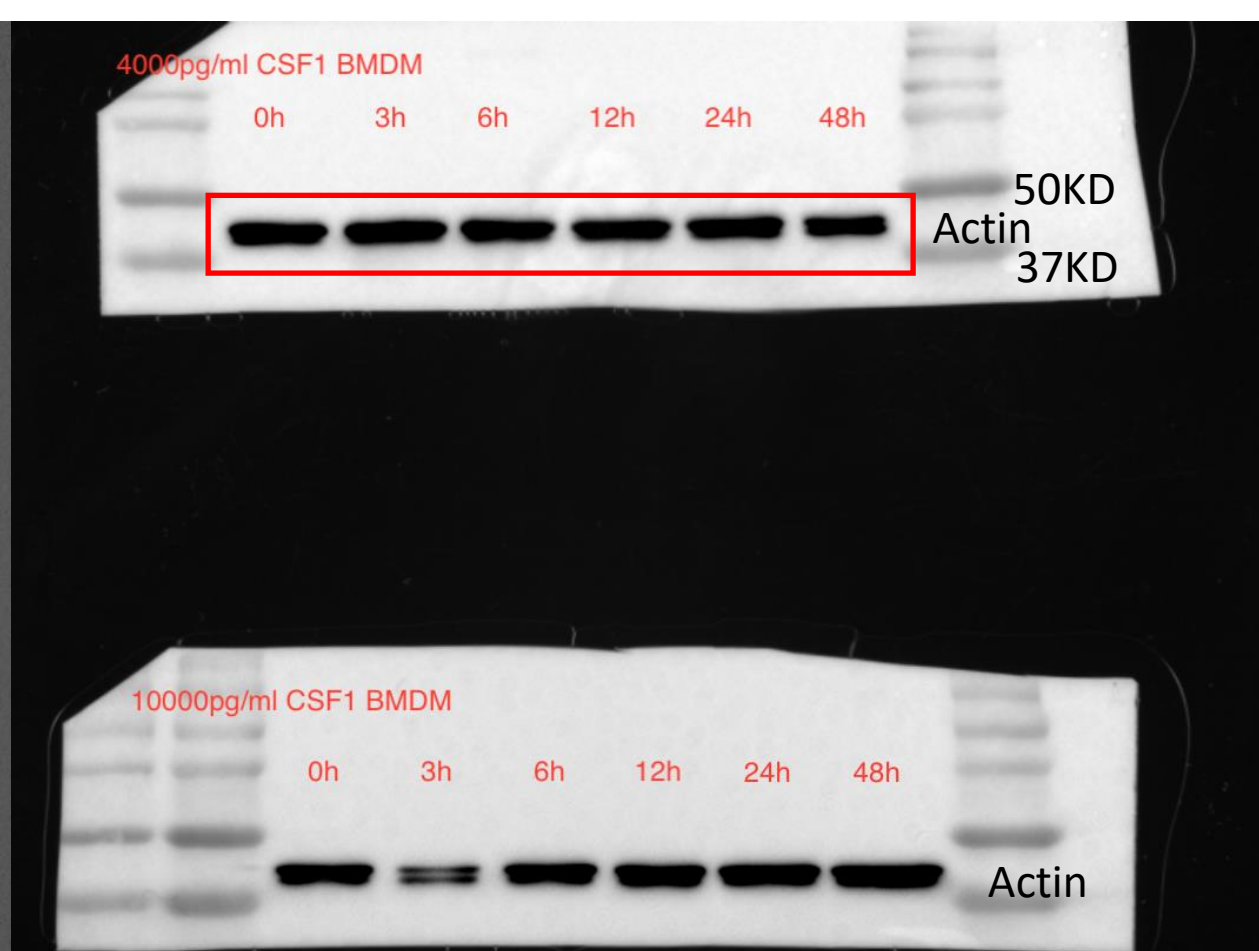

Fig 4B

BMDMs and Fibroblast TransWell

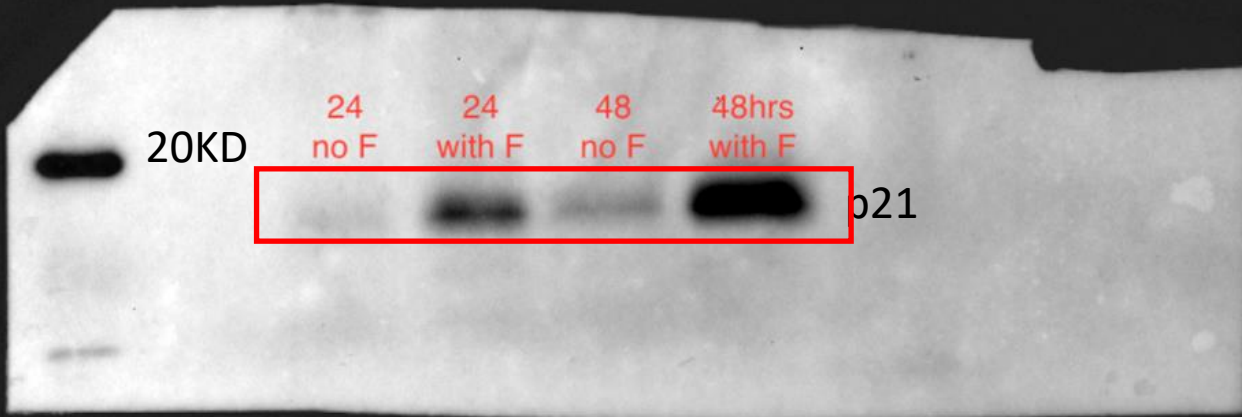

Fig 4D



BMDMs and Fibroblast TransWell

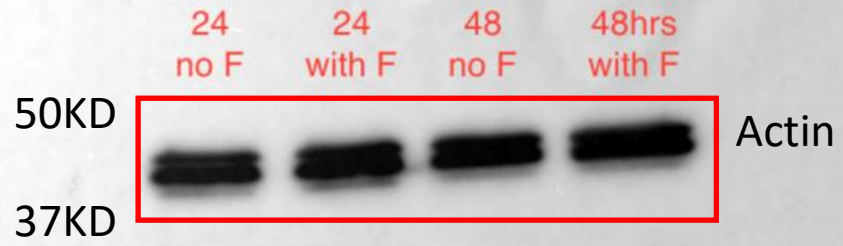

Fig 4D

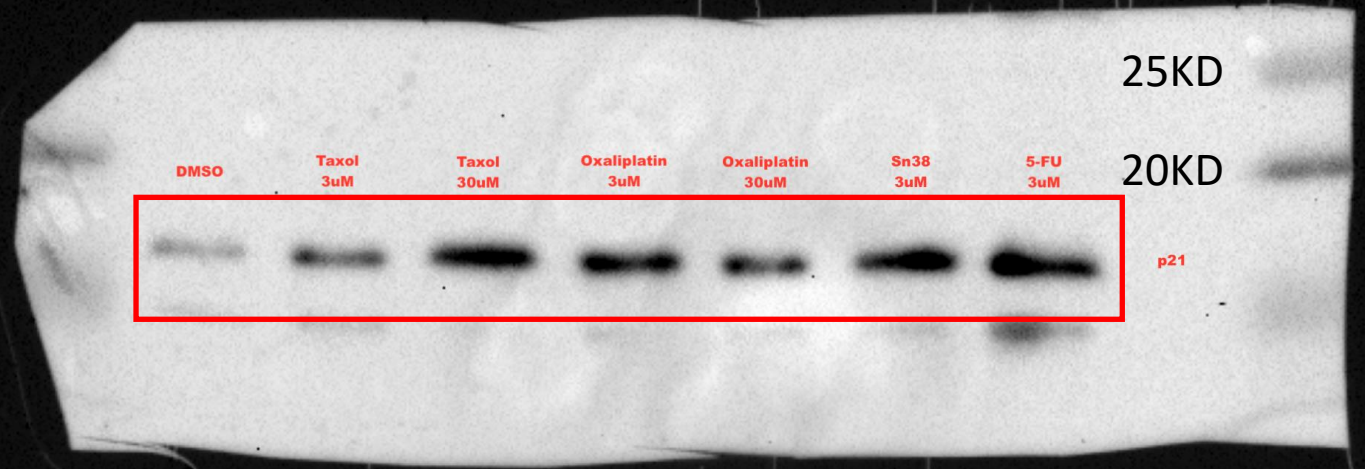

Fig 40

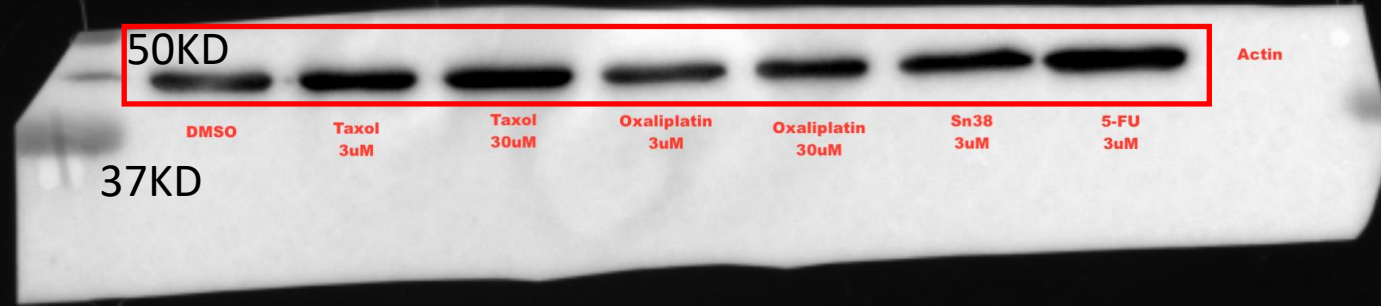

Fig 40
