# Supplementary material for: Stromal and therapy-induced macrophage proliferation promotes PDAC progression and susceptibility to innate immunotherapy
Source: PubMed Central journal article supplement — J Exp Med. 2023 Mar 23;220(6):e20212062. doi: 10.1084/jem.20212062 (PMC10072222; doi:10.1084/jem.20212062), 2023-03-23
Supplement: JEM_20212062_SourceDataF5.pdf [file JEM_20212062_SourceDataF5.pdf]

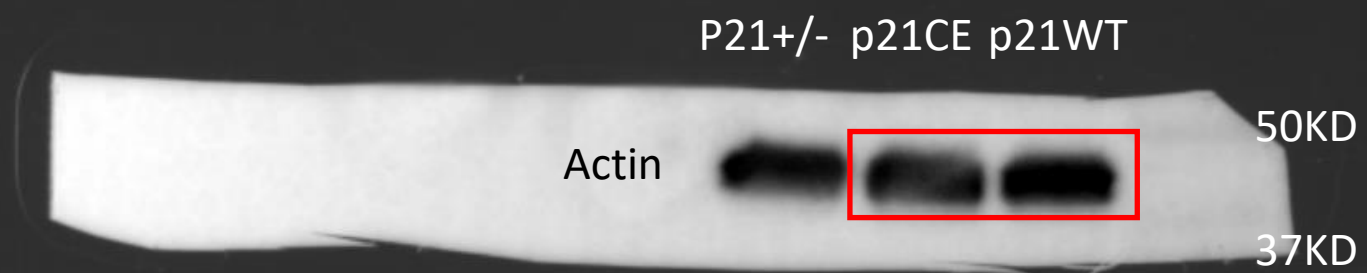

Fig 5B Left Panel

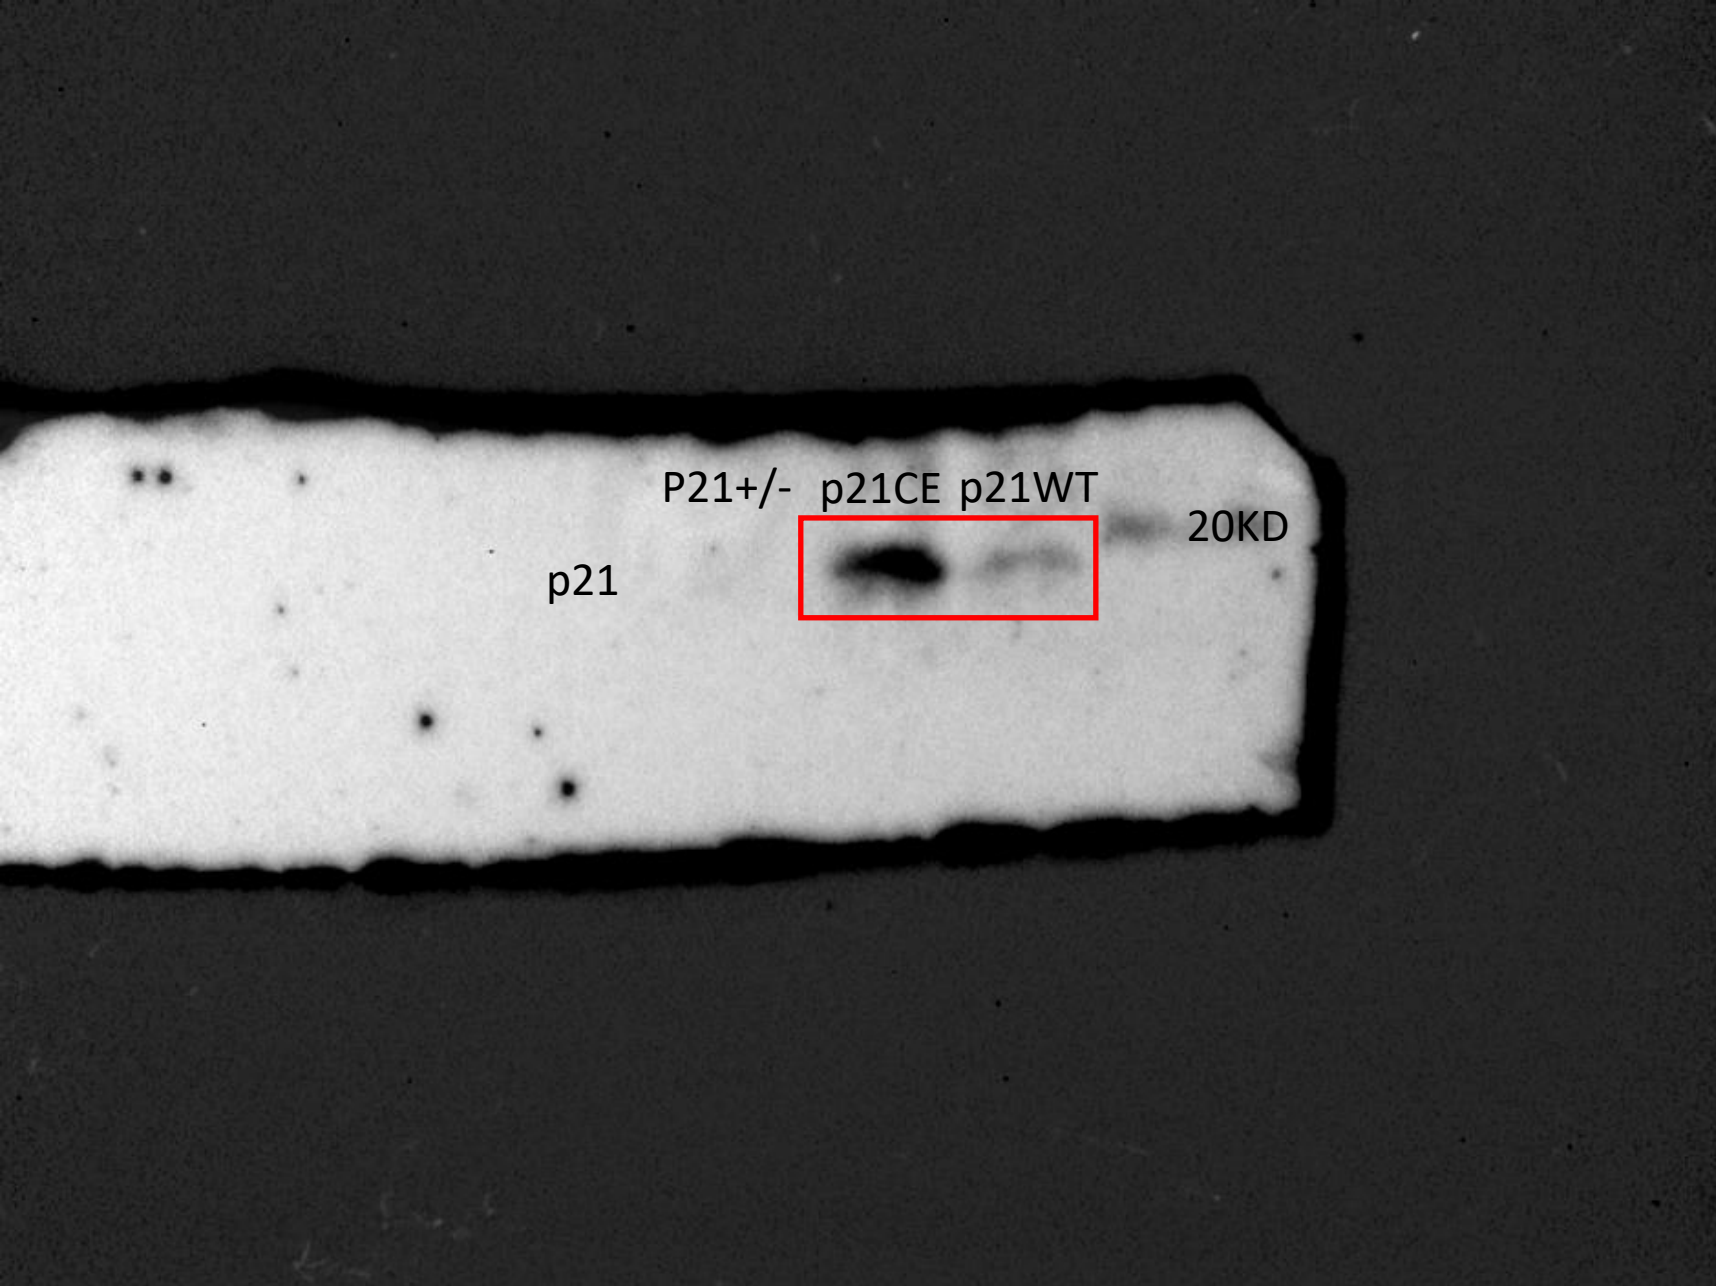

Fig 5B Left Panel

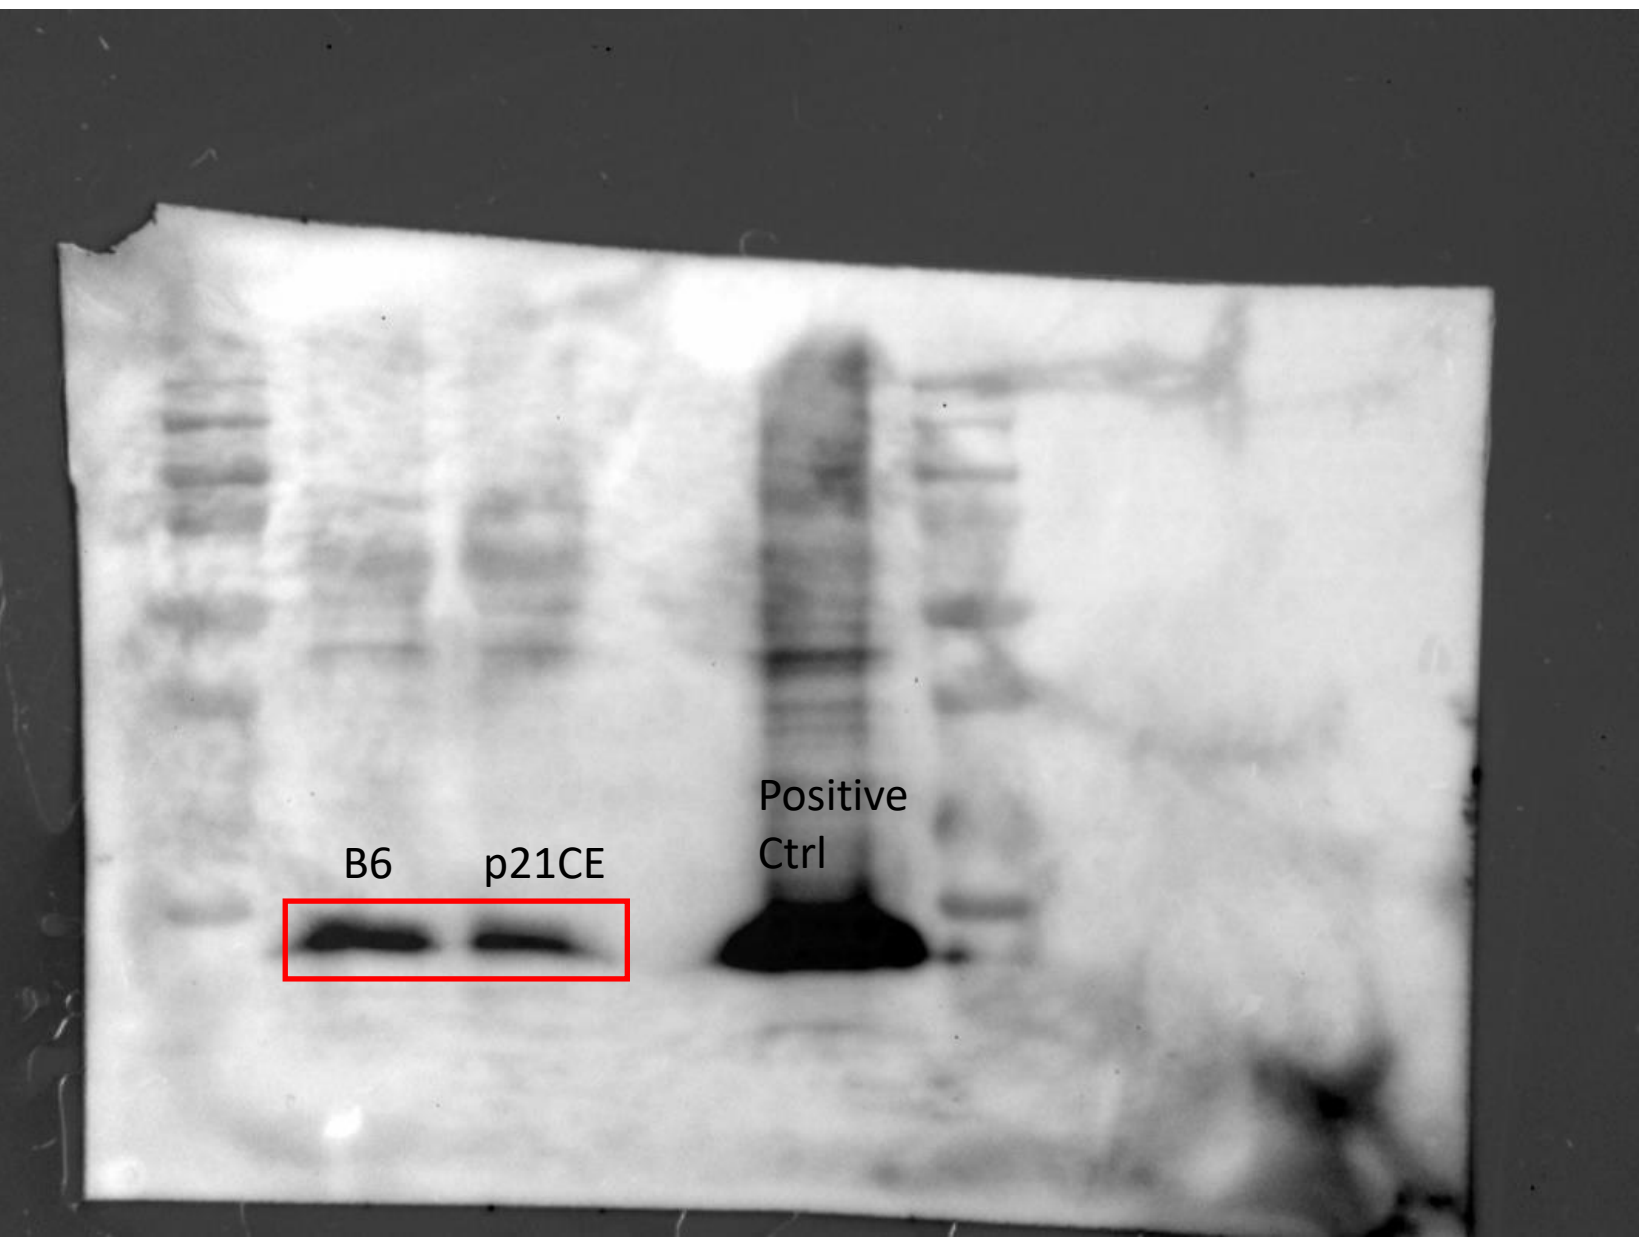

Fig 5B Right Panel

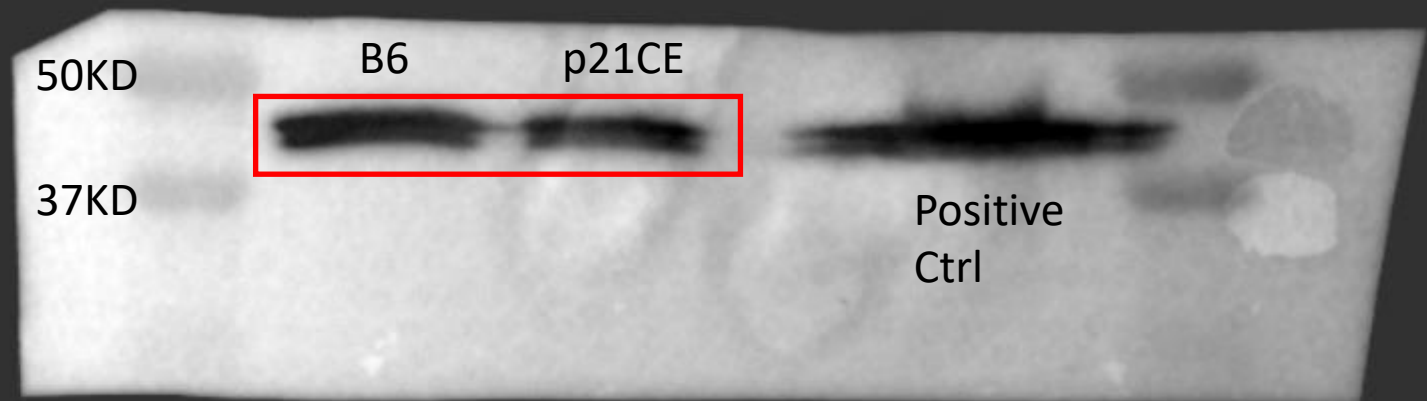

Fig 5B Right Panel

I $\kappa$ B

WT

CE

WT

CE

WT

CE

Fig 5F

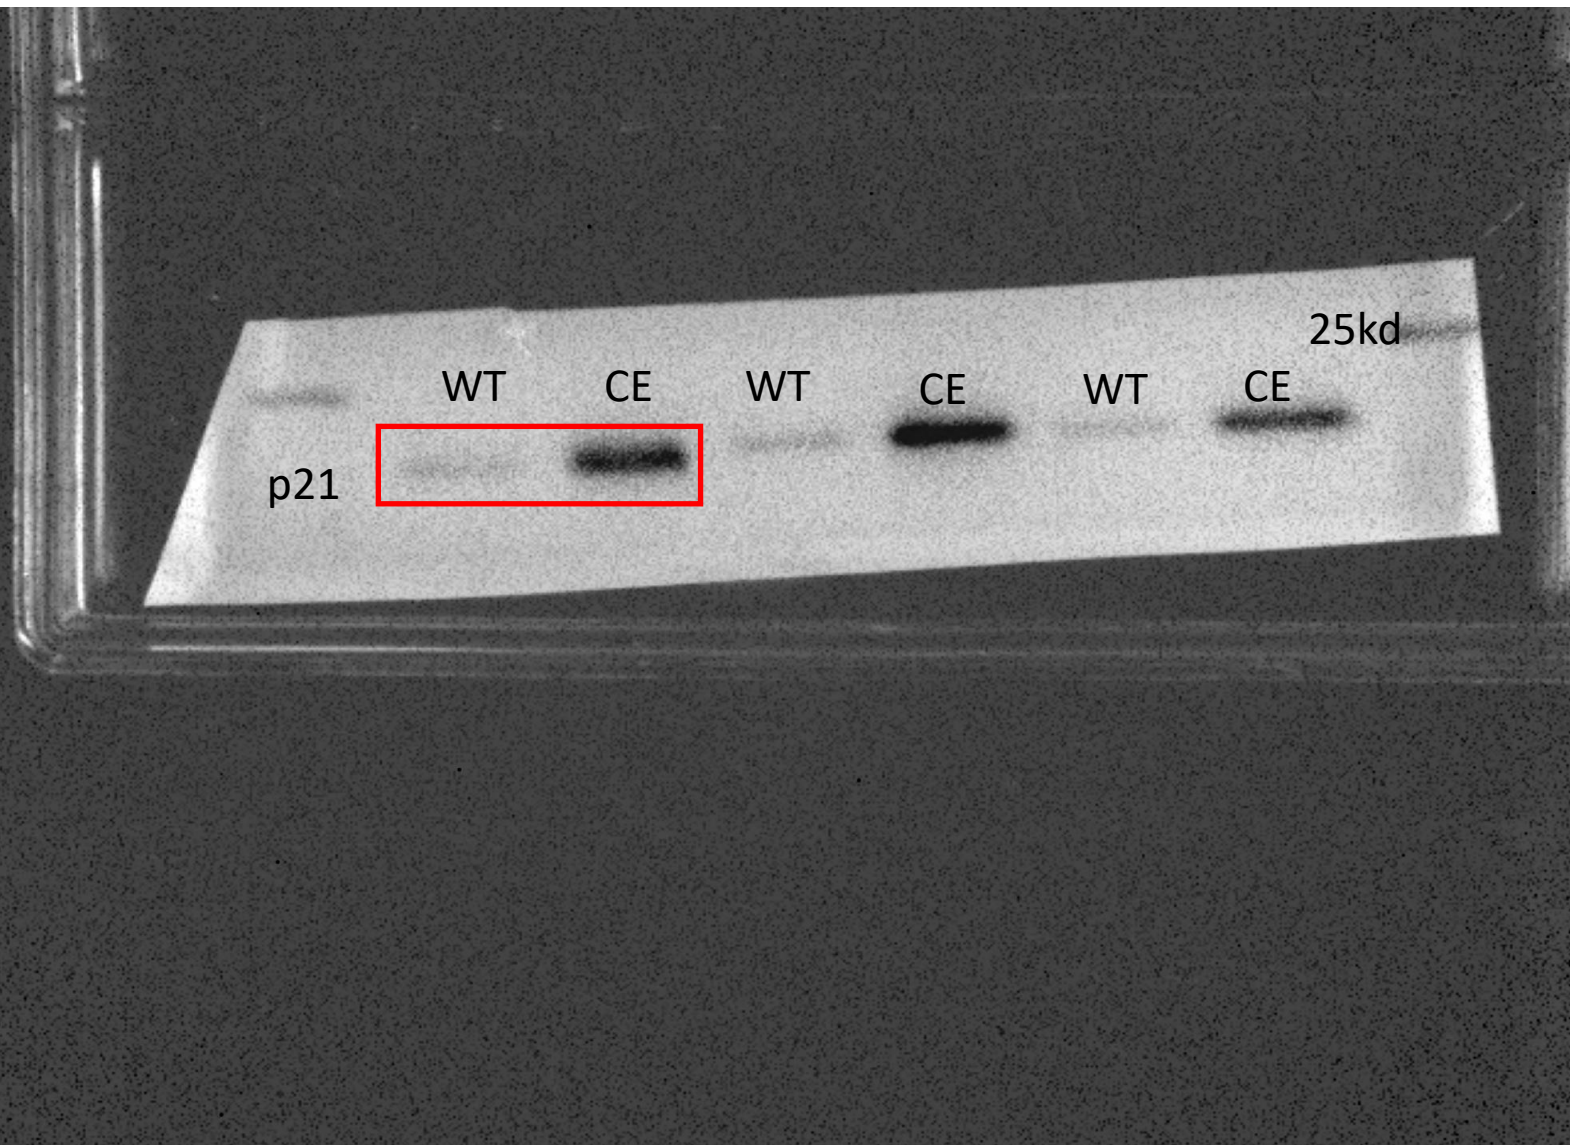

Fig 5F

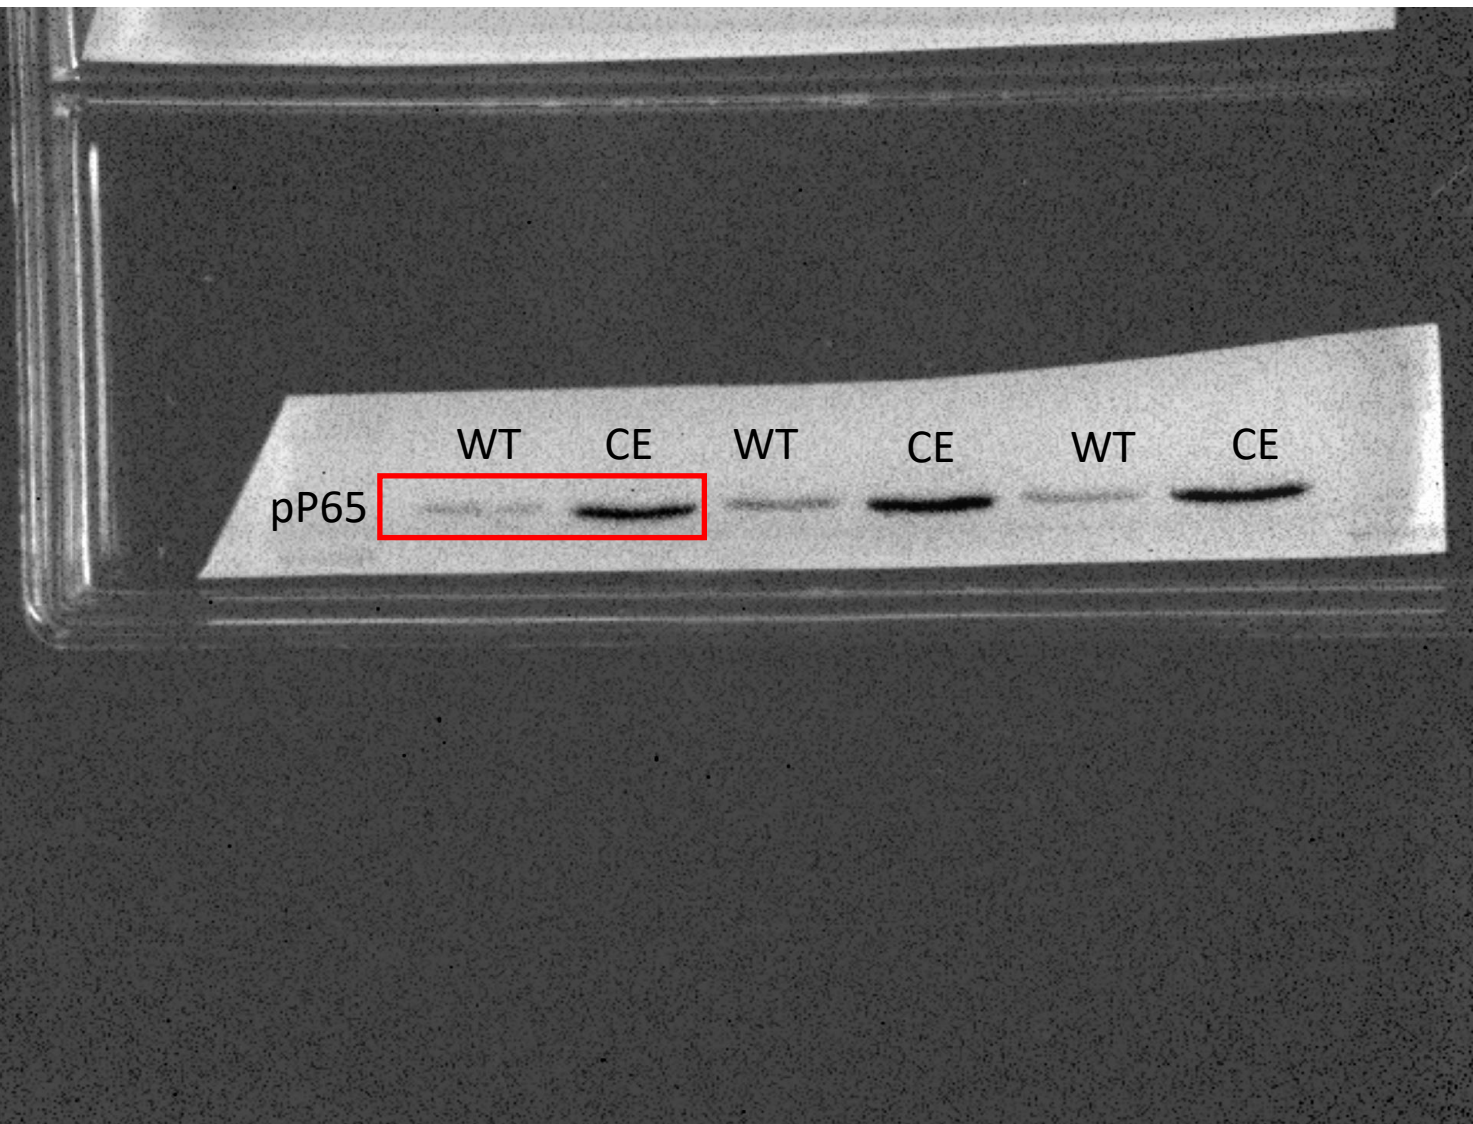

Fig 5F

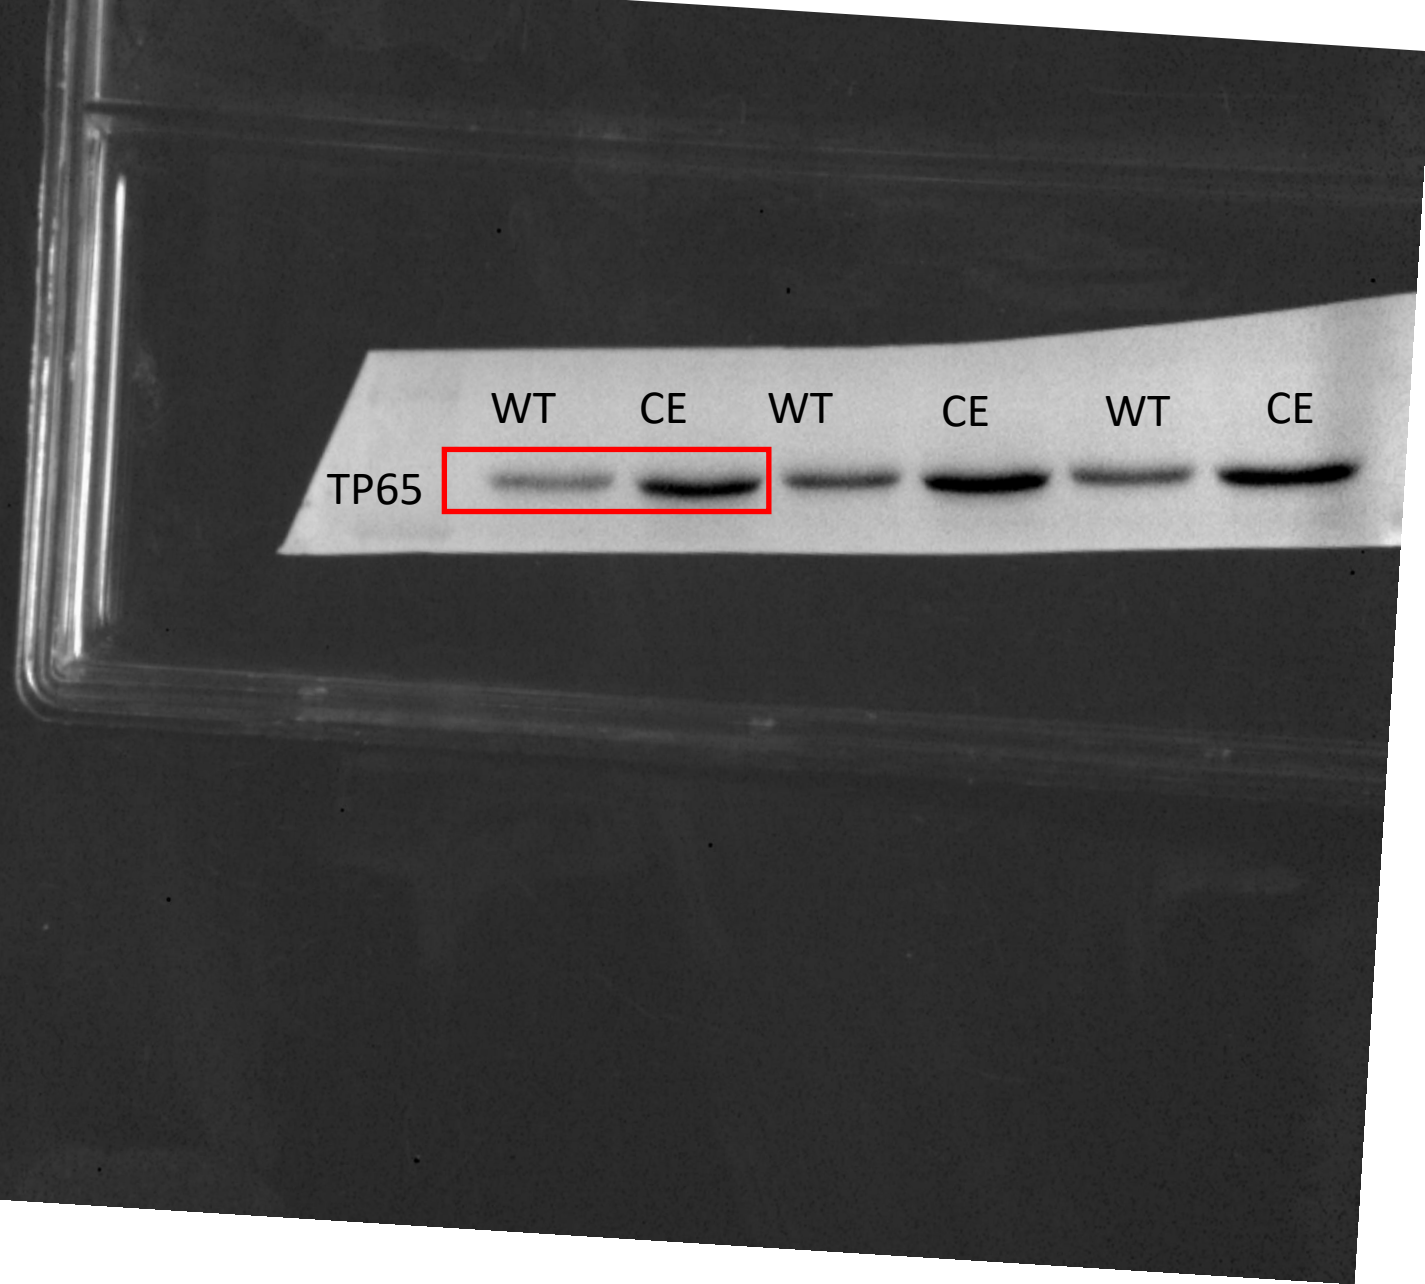

Fig 5F



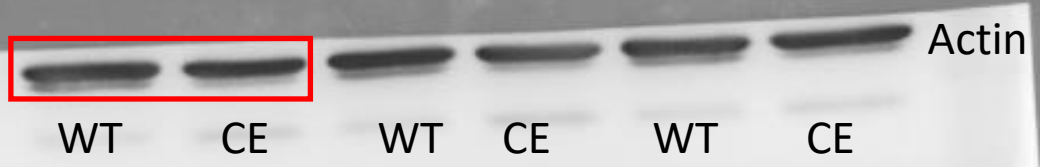

Fig 5F
