# Supplementary figures and images for: Stromal and therapy-induced macrophage proliferation promotes PDAC progression and susceptibility to innate immunotherapy
Source: PubMed Central journal article supplement — J Exp Med. 2023 Mar 23;220(6):e20212062. doi: 10.1084/jem.20212062 (PMC10072222; doi:10.1084/jem.20212062), 2023-03-23

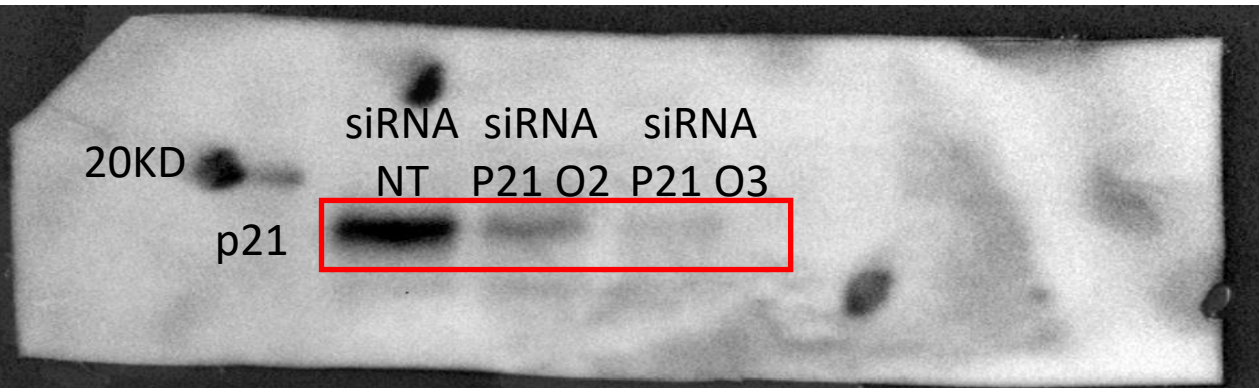

Fig S2B

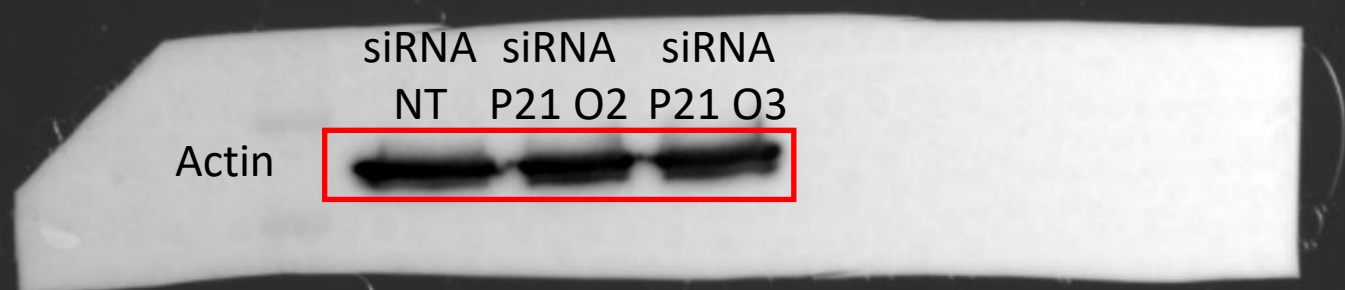

Fig S2B

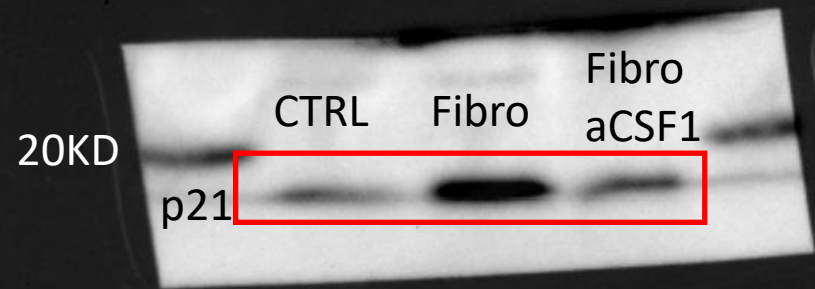

Fig S2M

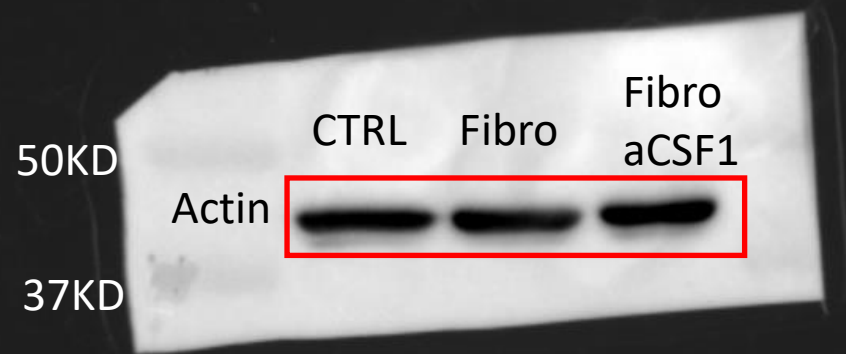

Fig S2M

Supplement: JEM_20212062_SourceDataFS2.pdf [file JEM_20212062_SourceDataFS2.pdf]
